# Supplementary material for: The Transcription Factor ZmNAC89 Gene Is Involved in Salt Tolerance in Maize (Zea mays L.)
Source: MDPI journal article supplement (doi:10.3390/ijms242015099), 2023-10-12
Supplement: s1 [file s1]

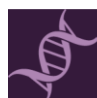

Table S1. NAC transcription factor protein for sequence alignment.

| Name      | Species                               | GenBank ID | Similarity (%) |
|-----------|---------------------------------------|------------|----------------|
| ATAF1     | <i>Arabidopsis thaliana</i>           | NP_171677  | 73             |
| ATAF2     | <i>Arabidopsis thaliana</i>           | CAA52772   | 70             |
| AtNAM     | <i>Arabidopsis thaliana</i>           | AAD17314   | 75             |
| AtNAP     | <i>Arabidopsis thaliana</i>           | NP_564966  | 76             |
| AtNAC2    | <i>Arabidopsis thaliana</i>           | NP_198777  | 62             |
| ANAC019   | <i>Arabidopsis thaliana</i>           | NP_175697  | 73             |
| ANAC025   | <i>Arabidopsis thaliana</i>           | NP_564771  | 74             |
| ANAC055   | <i>Arabidopsis thaliana</i>           | NP_188169  | 70             |
| ANAC072   | <i>Arabidopsis thaliana</i>           | NP_567773  | 70             |
| CUC1      | <i>Arabidopsis thaliana</i>           | BAB20598   | 63             |
| CUC2      | <i>Arabidopsis thaliana</i>           | BAA19529   | 64             |
| SNAC1     | <i>Oryza sativa</i>                   | ABD52007   | 71             |
| SNAC2     | <i>Oryza sativa</i>                   | CBX55846   | 74             |
| OsNAC1    | <i>Oryza sativa</i>                   | BAC53810   | 62             |
| OsNAC3    | <i>Oryza sativa</i>                   | BAA89797   | 69             |
| OsNAC4    | <i>Oryza sativa</i>                   | BAA89798   | 72             |
| OsNAC5    | <i>Oryza sativa</i>                   | BAA89799   | 75             |
| OsNAC6    | <i>Oryza sativa</i>                   | BAA89800   | 74             |
| OsNAC10   | <i>Oryza sativa</i>                   | AND61378   | 75             |
| GmNAC2    | <i>Glycine max</i>                    | AAY46122   | 72             |
| HvNAC     | <i>Hordeum vulgare subsp. vulgare</i> | BAJ94096   | 73             |
| TaNAC3    | <i>Triticum aestivum</i>              | AEI00651   | 75             |
| ZmNAC     | <i>Zea mays</i>                       | AEY78612   | 71             |
| ZmSNAC052 | <i>Zea mays</i>                       | AJK30592   | 69             |
| ZmNAC55   | <i>Zea mays</i>                       | AIB04554   | 74             |
| Zma000584 | <i>Zea mays</i>                       | AKG56066   | 67             |
| Zma006493 | <i>Zea mays</i>                       | AJE59925   | 64             |
| Zma054594 | <i>Zea mays</i>                       | ALB35041   | 67             |
| Zma001259 | <i>Zea mays</i>                       | AJE59926   | 72             |
| Zma003086 | <i>Zea mays</i>                       | ALA62811   | 74             |
| Zma029150 | <i>Zea mays</i>                       | AKG56067   | 64             |

Table S2A. Results of investigation of related traits during germination under salt stress.

| Lines       | Germination (%) | Germination rate (%) | Root length (cm) | Bud length (cm) | Fresh weight (g) | Dry weight (g) |
|-------------|-----------------|----------------------|------------------|-----------------|------------------|----------------|
| C01         | 38.27±0.60h     | 42.03±0.14g          | 1.77±0.06d       | 1.24±0.10b      | 0.38±0.01b       | 0.13±0.01ef    |
| DNAC89-C-3  | 61.20±3.07b     | 64.71±2.25b          | 2.22±0.21abc     | 1.76±0.17a      | 0.43±0.02a       | 0.18±0.01a     |
| DNAC89-C-5  | 55.95±0.31c     | 57.43±0.74c          | 2.32±0.09ab      | 1.72±0.17a      | 0.43±0.01a       | 0.17±0.01abc   |
| DNAC89-C-7  | 41.71±0.35gh    | 46.24±0.55ef         | 1.90±0.01bcd     | 1.53±0.15ab     | 0.39±0.01ab      | 0.14±0.01def   |
| DNAC89-C-9  | 50.70±0.54d     | 53.43±0.74d          | 1.90±0.04bcd     | 1.39±0.03ab     | 0.40±0.01ab      | 0.14±0.01def   |
| DNAC89-C-10 | 43.91±0.26fg    | 46.03±0.87fg         | 2.16±0.15abcd    | 1.59±0.03ab     | 0.39±0.03ab      | 0.15±0.02bcde  |
| DNAC89-C-13 | 47.40±1.24def   | 50.03±0.87de         | 2.00±0.02abcd    | 1.43±0.14ab     | 0.42±0.03ab      | 0.14±0.02cdef  |
| DNAC89-C-15 | 41.79±1.10gh    | 44.53±1.37fg         | 2.21±0.02abc     | 1.78±0.11a      | 0.41±0.02ab      | 0.14±0.01def   |
| DNAC89-C-18 | 45.25±1.61efg   | 46.96±1.60ef         | 2.28±0.25ab      | 1.60±0.04ab     | 0.42±0.01ab      | 0.15±0.01bcde  |
| DNAC89-C-20 | 48.54±1.59de    | 51.25±0.89d          | 1.84±0.06d       | 1.46±0.11ab     | 0.37±0.02b       | 0.14±0.01cdef  |
| DNAC89-C-21 | 42.13±2.01gh    | 45.33±1.64fg         | 2.04±0.08abcd    | 1.54±0.09ab     | 0.38±0.01ab      | 0.12±0.01f     |
| DNAC89-C-25 | 66.67±1.11a     | 69.24±0.88a          | 2.42±0.21a       | 1.78±0.14a      | 0.43±0.01a       | 0.17±0.02ab    |
| DNAC89-C-28 | 41.76±1.40gh    | 44.38±2.22fg         | 2.02±0.17abcd    | 1.60±0.27ab     | 0.41±0.02ab      | 0.16±0.01abcd  |
| DNAC89-C-29 | 41.62±1.64gh    | 43.69±1.68fg         | 1.79±0.06d       | 1.42±0.16ab     | 0.38±0.02ab      | 0.14±0.01cdef  |
| DNAC89-C-31 | 43.56±0.70fg    | 46.12±0.14f          | 1.82±0.04d       | 1.57±0.11ab     | 0.40±0.01ab      | 0.16±0.01abcd  |
| DNAC89-C-33 | 43.09±0.93fg    | 45.81±0.45fg         | 1.85±0.17d       | 1.50±0.21ab     | 0.39±0.01ab      | 0.14±0.01cdef  |
| DNAC89-C-35 | 44.18±1.02fg    | 46.84±0.06ef         | 1.78±0.16d       | 1.43±0.09ab     | 0.37±0.01b       | 0.13±0.01ef    |
| DNAC89-C-36 | 41.73±1.44gh    | 45.14±0.99fg         | 1.85±0.06d       | 1.54±0.06ab     | 0.42±0.01ab      | 0.13±0.01ef    |

Table S2B. Results of investigation of related traits during germination under alkaline stress.

| Lines       | Germination (%) | Germination rate (%) | Root length (cm) | Bud length (cm) | Fresh weight (g) | Dry weight (g) |
|-------------|-----------------|----------------------|------------------|-----------------|------------------|----------------|
| C01         | 42.98±0.72g     | 52.44±0.42i          | 1.13±0.12f       | 1.77±0.45bc     | 0.44±0.04bcde    | 0.19±0.03cd    |
| DNAC89-C-3  | 65.81±0.35b     | 74.01±1.16b          | 2.42±0.11a       | 2.65±0.17a      | 0.55±0.04a       | 0.27±0.01a     |
| DNAC89-C-5  | 61.07±0.82c     | 69.86±1.58c          | 2.23±0.11ab      | 2.66±0.24a      | 0.56±0.02a       | 0.26±0.01a     |
| DNAC89-C-7  | 46.94±0.96e     | 55.32±0.66fghi       | 1.42±0.10ef      | 1.63±0.19bc     | 0.45±0.02bcd     | 0.19±0.01cd    |
| DNAC89-C-9  | 46.84±0.72e     | 55.07±0.09fghi       | 1.52±0.11de      | 1.64±0.19bc     | 0.40±0.03cde     | 0.17±0.01d     |
| DNAC89-C-10 | 46.28±0.42ef    | 54.07±1.09ghi        | 2.42±0.20a       | 1.95±0.12bc     | 0.44±0.04bcde    | 0.20±0.01bcd   |
| DNAC89-C-13 | 45.74±0.62ef    | 59.39±0.75d          | 1.75±0.27cde     | 2.10±0.04b      | 0.48±0.04b       | 0.19±0.03cd    |
| DNAC89-C-15 | 45.88±0.72ef    | 54.07±0.09ghi        | 1.41±0.10ef      | 1.90±0.02bc     | 0.41±0.01bcde    | 0.22±0.01abcd  |
| DNAC89-C-18 | 45.28±1.32efg   | 52.81±0.35hi         | 1.70±0.02cde     | 1.59±0.03bc     | 0.39±0.01de      | 0.22±0.03abcd  |
| DNAC89-C-20 | 43.84±0.28fg    | 55.12±0.14fghi       | 1.52±0.40de      | 1.56±0.11bc     | 0.44±0.02bcde    | 0.23±0.01abc   |
| DNAC89-C-21 | 66.14±0.98b     | 69.29±0.83c          | 1.89±0.40bcd     | 1.75±0.08bc     | 0.46±0.01bc      | 0.20±0.02bcd   |
| DNAC89-C-25 | 73.36±1.20a     | 83.13±1.01a          | 1.98±0.06bc      | 2.76±0.14a      | 0.58±0.03a       | 0.26±0.02ab    |
| DNAC89-C-28 | 43.64±0.48fg    | 55.77±1.09efghi      | 1.45±0.13ef      | 1.62±0.20bc     | 0.46±0.01bcd     | 0.20±0.01bcd   |
| DNAC89-C-29 | 44.32±1.36efg   | 53.77±1.09hi         | 1.90±0.12bcd     | 1.75±0.08bc     | 0.41±0.02bcde    | 0.22±0.01ab    |
| DNAC89-C-31 | 46.10±0.47ef    | 55.98±0.52efgh       | 1.54±0.03de      | 1.51±0.22bc     | 0.38±0.02e       | 0.20±0.01cd    |
| DNAC89-C-33 | 49.49±0.63d     | 58.31±0.85def        | 1.51±0.02def     | 1.40±0.06c      | 0.43±0.02bcde    | 0.20±0.02bcd   |
| DNAC89-C-35 | 46.24±0.23ef    | 58.82±1.34de         | 1.41±0.10ef      | 1.66±0.19bc     | 0.44±0.02bcde    | 0.17±0.02d     |
| DNAC89-C-36 | 43.71±1.15fg    | 57.47±2.31defg       | 1.36±0.13ef      | 1.74±0.07bc     | 0.46±0.01bcd     | 0.20±0.01cd    |

Table S2C. Results of investigation of related traits during germination under saline-alkali stress.

| Lines       | Germination (%) | Germination rate (%) | Root length (cm) | Bud length (cm) | Fresh weight (g) | Dry weight (g) |
|-------------|-----------------|----------------------|------------------|-----------------|------------------|----------------|
| C01         | 33.39±0.29f     | 39.50±0.49g          | 0.81±0.10def     | 0.65±0.08cd     | 0.36±0.01cd      | 0.13±0.01b     |
| DNAC89-C-3  | 56.42±1.17a     | 62.02±0.66a          | 1.49±0.11a       | 1.00±0.03ab     | 0.42±0.02ab      | 0.18±0.01a     |
| DNAC89-C-5  | 45.85±0.16c     | 51.01±0.66b          | 1.21±0.03bc      | 1.16±0.04a      | 0.42±0.01ab      | 0.17±0.01ab    |
| DNAC89-C-7  | 35.81±0.35ef    | 42.86±0.71def        | 1.01±0.03bcde    | 0.70±0.08bcd    | 0.40±0.01abc     | 0.15±0.01ab    |
| DNAC89-C-9  | 35.84±1.06ef    | 40.90±0.12fg         | 0.96±0.05bcde    | 0.62±0.11d      | 0.37±0.01bcd     | 0.16±0.01ab    |
| DNAC89-C-10 | 36.03±0.14ef    | 41.94±0.25ef         | 0.78±0.09ef      | 0.98±0.04abc    | 0.35±0.01cd      | 0.16±0.01ab    |
| DNAC89-C-13 | 36.12±0.86ef    | 42.17±0.81ef         | 0.67±0.06f       | 0.82±0.03bcd    | 0.34±0.02d       | 0.14±0.01ab    |
| DNAC89-C-15 | 35.83±0.67ef    | 41.66±1.50efg        | 1.17±0.07bc      | 1.02±0.01ab     | 0.35±0.03cd      | 0.17±0.01ab    |
| DNAC89-C-18 | 36.85±1.17d     | 43.18±0.39cdef       | 1.00±0.08bcde    | 0.90±0.01abcd   | 0.36±0.01cd      | 0.14±0.02ab    |
| DNAC89-C-20 | 39.56±0.60d     | 44.62±0.49cd         | 1.11±0.10bc      | 1.00±0.07ab     | 0.38±0.02abcd    | 0.17±0.01ab    |
| DNAC89-C-21 | 37.21±1.25de    | 42.51±1.05def        | 1.19±0.13bc      | 0.96±0.07abcd   | 0.38±0.01abcd    | 0.17±0.01ab    |
| DNAC89-C-25 | 51.43±0.98b     | 61.48±0.69a          | 1.25±0.12ab      | 1.00±0.17ab     | 0.43±0.03a       | 0.17±0.02ab    |
| DNAC89-C-28 | 37.12±1.48de    | 42.86±0.30def        | 1.00±0.08bcde    | 0.72±0.26bcd    | 0.40±0.01abc     | 0.18±0.02a     |
| DNAC89-C-29 | 35.53±0.64ef    | 41.94±1.05ef         | 1.24±0.07ab      | 0.89±0.13abcd   | 0.35±0.03cd      | 0.18±0.01a     |
| DNAC89-C-31 | 37.19±1.30d     | 42.84±0.86def        | 1.13±0.09bc      | 0.78±0.19bcd    | 0.39±0.03abcd    | 0.18±0.03a     |
| DNAC89-C-33 | 39.55±0.59d     | 43.71±0.54cde        | 0.81±0.12def     | 0.78±0.03bcd    | 0.37±0.01bcd     | 0.16±0.02ab    |
| DNAC89-C-35 | 39.35±1.67d     | 45.34±0.36c          | 0.93±0.09cdef    | 0.73±0.06bcd    | 0.36±0.04cd      | 0.17±0.01ab    |
| DNAC89-C-36 | 35.81±0.65ef    | 41.71±0.18efg        | 1.07±0.06bcd     | 0.80±0.09bcd    | 0.40±0.02abc     | 0.16±0.01ab    |

Table S3A. Determination of physiological parameters of T<sub>2</sub> transgenic lines with *ZmNAC89* gene under NaCl stress.

| Lines       | Relative conductivity (%) | Chlorophyll (mg·g <sup>-1</sup> ) | Proline (μg·g <sup>-1</sup> ) |
|-------------|---------------------------|-----------------------------------|-------------------------------|
| C01         | 36.20±0.23a               | 29.27±0.27c                       | 20.58±0.56g                   |
| DNAC89-C-3  | 31.83±0.77b               | 33.50±2.10ab                      | 27.23±1.24bcde                |
| DNAC89-C-5  | 30.93±0.34b               | 36.13±1.24a                       | 31.86±1.41a                   |
| DNAC89-C-7  | 31.43±1.15b               | 34.47±1.21ab                      | 22.47±0.08efg                 |
| DNAC89-C-9  | 32.78±0.33ab              | 32.63±2.12abc                     | 25.77±0.45cdef                |
| DNAC89-C-10 | 34.13±0.89ab              | 33.97±1.79ab                      | 28.35±0.10abcd                |
| DNAC89-C-13 | 33.04±0.98ab              | 32.77±1.39abc                     | 22.52±0.02fg                  |
| DNAC89-C-15 | 33.05±0.69ab              | 32.00±0.36abc                     | 29.97±1.84ab                  |
| DNAC89-C-18 | 31.65±1.01b               | 33.63±0.99ab                      | 25.20±1.04def                 |
| DNAC89-C-20 | 32.57±0.92b               | 32.70±1.46abc                     | 26.73±1.78bcdef               |
| DNAC89-C-21 | 33.25±1.66ab              | 31.67±0.58bc                      | 32.03±0.07a                   |
| DNAC89-C-25 | 30.99±0.51b               | 34.40±1.00ab                      | 31.45±2.28a                   |
| DNAC89-C-28 | 32.21±0.62b               | 30.83±0.64bc                      | 29.45±1.08abc                 |
| DNAC89-C-29 | 31.25±1.71b               | 33.93±1.51ab                      | 29.99±0.79ab                  |
| DNAC89-C-31 | 32.89±1.31ab              | 33.73±0.84ab                      | 23.92±1.89efg                 |
| DNAC89-C-33 | 32.33±0.93b               | 33.90±0.25ab                      | 23.39±1.08efg                 |
| DNAC89-C-35 | 32.70±1.45ab              | 33.70±1.46ab                      | 22.63±0.75a                   |
| DNAC89-C-36 | 33.31±1.25ab              | 33.80±0.61ab                      | 22.27±0.89acb                 |

Table S3B. Determination of physiological parameters of T<sub>2</sub> transgenic lines with *ZmNAC89* gene under Na<sub>2</sub>CO<sub>3</sub> stress.

| Lines       | Relative conductivity (%) | Chlorophyll (mg·g <sup>-1</sup> ) | Proline (μg·g <sup>-1</sup> ) |
|-------------|---------------------------|-----------------------------------|-------------------------------|
| C01         | 27.64±0.52a               | 27.20±1.60c                       | 27.07±0.55e                   |
| DNAC89-C-3  | 23.55±0.12ef              | 32.30±0.95b                       | 34.19±1.08a                   |
| DNAC89-C-5  | 22.86±0.30f               | 37.90±1.17a                       | 34.22±1.08a                   |
| DNAC89-C-7  | 25.84±0.05abcd            | 29.67±1.49bc                      | 29.25±1.39cde                 |
| DNAC89-C-9  | 25.87±0.15abcd            | 30.50±1.48bc                      | 29.50±0.71cde                 |
| DNAC89-C-10 | 26.29±0.83abc             | 29.90±0.96bc                      | 31.93±0.34abcd                |
| DNAC89-C-13 | 25.84±0.28abcd            | 31.10±0.35bc                      | 31.81±1.69abcd                |
| DNAC89-C-15 | 25.99±0.93abcd            | 29.93±0.60bc                      | 29.37±0.91cde                 |
| DNAC89-C-18 | 26.03±0.80abc             | 31.63±1.27bc                      | 31.16±1.70abcde               |
| DNAC89-C-20 | 26.74±0.58abc             | 32.77±0.76b                       | 31.88±0.63abcd                |
| DNAC89-C-21 | 24.97±0.04cde             | 33.63±1.60b                       | 29.95±1.82bcde                |
| DNAC89-C-25 | 23.60±0.44ef              | 39.63±1.53a                       | 33.92±1.84ab                  |
| DNAC89-C-28 | 26.10±0.34abc             | 31.87±0.72b                       | 31.80±1.69abcd                |
| DNAC89-C-29 | 26.57±0.33abc             | 31.27±1.33bc                      | 29.75±1.34cde                 |
| DNAC89-C-31 | 26.94±0.33ab              | 30.83±1.85bc                      | 28.79±0.84de                  |
| DNAC89-C-33 | 26.11±0.13abc             | 31.23±2.83bc                      | 31.95±1.80abcd                |
| DNAC89-C-35 | 25.77±0.79bcd             | 32.10±0.87b                       | 31.98±1.41abcd                |
| DNAC89-C-36 | 26.13±0.62abc             | 32.63±0.90b                       | 31.15±1.07abcde               |

Table S3C. Determination of physiological parameters of T<sub>2</sub> transgenic lines with *ZmNAC89* gene under saline-alkali mixed stress.

| Lines       | Relative conductivity (%) | Chlorophyll (mg·g <sup>-1</sup> ) | Proline (μg·g <sup>-1</sup> ) |
|-------------|---------------------------|-----------------------------------|-------------------------------|
| C01         | 33.71±0.65a               | 19.60±0.46d                       | 29.27±0.85e                   |
| DNAC89-C-3  | 29.21±0.65e               | 26.50±0.70a                       | 34.78±0.87a                   |
| DNAC89-C-5  | 29.07±0.09e               | 27.43±1.22a                       | 34.73±1.16a                   |
| DNAC89-C-7  | 32.54±0.44abc             | 21.47±1.82bcd                     | 32.11±0.90abcd                |
| DNAC89-C-9  | 31.76±0.55ab              | 24.13±0.73abc                     | 30.56±1.46cde                 |
| DNAC89-C-10 | 31.51±0.49bcd             | 20.63±1.09d                       | 30.18±0.85de                  |
| DNAC89-C-13 | 32.95±0.89ab              | 25.63±0.27ab                      | 31.94±1.52abcde               |
| DNAC89-C-15 | 32.04±0.98abcd            | 25.27±0.67abc                     | 31.97±0.26abcde               |
| DNAC89-C-18 | 32.01±0.75abcd            | 26.33±1.21a                       | 31.06±0.91bcde                |
| DNAC89-C-20 | 31.12±0.14bcd             | 25.73±0.12a                       | 32.29±0.40abcd                |
| DNAC89-C-21 | 31.92±0.70abcd            | 24.23±0.70abc                     | 32.18±0.66abcd                |
| DNAC89-C-25 | 30.97±0.08bcde            | 27.10±1.25a                       | 33.21±0.65abc                 |
| DNAC89-C-28 | 30.09±0.73de              | 21.37±2.55cd                      | 31.09±0.95bcde                |
| DNAC89-C-29 | 32.33±0.68abc             | 24.03±2.12abc                     | 32.61±1.15abcd                |
| DNAC89-C-31 | 30.93±0.09bcde            | 23.73±0.92abc                     | 31.94±0.26abcde               |
| DNAC89-C-33 | 30.62±0.64cde             | 26.60±0.64a                       | 32.46±0.58abcd                |
| DNAC89-C-35 | 30.88±0.39bcde            | 23.93±1.52abc                     | 31.41±0.34bcde                |
| DNAC89-C-36 | 32.33±0.77abc             | 23.37±1.55abc                     | 32.79±0.08abcd                |

Table S4A. SNP and haplotype of *ZmNAC89* gene.

| Haplotypes | No. of lines | SNP location |     |     |     |     |     |     |     |     |     |     |     |     |     |     |     |
|------------|--------------|--------------|-----|-----|-----|-----|-----|-----|-----|-----|-----|-----|-----|-----|-----|-----|-----|
|            |              | 124          | 142 | 145 | 181 | 191 | 211 | 218 | 244 | 253 | 375 | 500 | 624 | 712 | 719 | 767 | 885 |
| HAP1       | 40           | C            | G   | A   | G   | G   | G   | T   | C   | T   | G   | G   | G   | C   | A   | G   | C   |
| HAP2       | 21           | G            | G   | G   | G   | G   | G   | T   | C   | C   | C   | G   | G   | C   | G   | G   | C   |
| HAP3       | 5            | G            | G   | G   | G   | G   | G   | T   | C   | T   | G   | G   | G   | C   | A   | G   | C   |
| HAP4       | 1            | C            | A   | G   | A   | G   | G   | C   | T   | C   | C   | G   | G   | C   | A   | G   | C   |
| HAP5       | 3            | G            | G   | G   | G   | G   | G   | T   | C   | T   | G   | G   | G   | C   | A   | G   | C   |
| HAP6       | 3            | C            | A   | G   | A   | A   | G   | T   | C   | C   | C   | G   | G   | C   | A   | C   | C   |
| HAP7       | 1            | C            | G   | A   | G   | G   | G   | T   | C   | T   | G   | G   | G   | C   | G   | G   | C   |
| HAP8       | 1            | C            | A   | G   | G   | G   | T   | C   | T   | C   | C   | G   | A   | C   | A   | G   | C   |
| HAP9       | 1            | C            | A   | G   | A   | G   | T   | C   | T   | C   | C   | G   | A   | C   | A   | G   | C   |
| HAP10      | 1            | G            | G   | G   | G   | G   | G   | T   | C   | C   | C   | G   | G   | C   | A   | C   | C   |
| HAP11      | 1            | C            | G   | A   | A   | G   | G   | C   | T   | C   | C   | C   | G   | C   | A   | C   | C   |
| HAP12      | 1            | C            | A   | G   | A   | G   | G   | T   | C   | T   | G   | G   | G   | C   | A   | G   | C   |
| HAP13      | 1            | C            | G   | A   | G   | G   | G   | C   | C   | C   | C   | G   | G   | C   | A   | G   | C   |
| HAP14      | 1            | C            | A   | G   | A   | A   | G   | T   | C   | C   | C   | C   | G   | C   | G   | G   | C   |
| HAP15      | 1            | G            | G   | G   | G   | G   | G   | T   | C   | C   | C   | G   | G   | C   | A   | G   | C   |
| HAP16      | 1            | C            | G   | A   | G   | G   | G   | T   | C   | T   | C   | G   | G   | C   | A   | G   | C   |
| HAP17      | 1            | C            | G   | A   | G   | G   | G   | T   | C   | T   | G   | G   | G   | C   | A   | C   | C   |
| HAP18      | 1            | C            | G   | A   | G   | G   | G   | T   | C   | T   | G   | G   | G   | C   | A   | G   | T   |
| HAP19      | 1            | C            | G   | A   | G   | G   | G   | T   | C   | T   | G   | G   | G   | T   | A   | G   | C   |
| HAP20      | 54           | C            | G   | A   | G   | G   | G   | T   | C   | T   | G   | G   | G   | C   | A   | C   | C   |



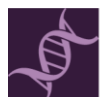

Table S4B. Changes of amino acids corresponding to SNP of *ZmNAC89* gene.

| No.    | SNP location | Amino acid changes | Base mutation |
|--------|--------------|--------------------|---------------|
| SNP124 | 124          | R/G                | GGC/GGG       |
| SNP142 | 142          | A/T                | GAG/GAA       |
| SNP145 | 145          | T/A                | CCA/CCG       |
| SNP181 | 181          | V/M                | GTG/ATG       |
| SNP191 | 191          | G/D                | TGG/TGA       |
| SNP218 | 218          | V/A                | GTT/GCT       |
| SNP253 | 253          | C/R                | GCT/GCC       |
| SNP500 | 500          | S/T                | AGT/ACT       |
| SNP712 | 712          | H/Y                | CAT/TAT       |
| SNP767 | 767          | G/A                | TGG/TGC       |

Table S5. Primer pairs list.

| Assays                      | Primer Name       | Primer sequence (5'–3')   |
|-----------------------------|-------------------|---------------------------|
| RT-qPCR                     | qZmNAC89-F        | CTCAACGGTGGCTCCTGCTTC     |
|                             | qZmNAC89-R        | TCCTTGCTTTCCATGTCGC       |
|                             | qActin-F          | GTTGGGCGTCCTCGTCA         |
|                             | qActin-R          | TGGGTCATCTTCTCCCTGTT      |
|                             | Bar-F             | GTTGAGCAGATCTCGGTGAC      |
|                             | Bar-R             | GCACCATCGTCAACCACTAC      |
|                             | qZm00001d014364-F | CTCTACGACGTCGGAAACC       |
|                             | qZm00001d014364-R | GGTAGTTCTGGTTGATCAGTGG    |
|                             | qZm00001d044546-F | TCTGAATCCCTGTCCG          |
|                             | qZm00001d044546-R | CCAATGTGCCCAACC           |
| Clone                       | ZmNAC89-ORF-F     | CGAATTCATGTGCCCCAACAAGT   |
|                             | ZmNAC89-ORF-R     | GGAATTCTCAGCAGCAGCGCAGGCG |
| Plant transformation        | 35S-ZmNAC89-F     | CACAGGGACAACACACCATAAGA   |
|                             | ZmNAC89-Hsp-R     | AGAAAACACTGGGGAAAGAAACA   |
|                             | ZmNAC89-1F        | CCGGAATGCCCAGCCTG         |
| Sequence variation analysis | ZmNAC89-1R        | GCCAGCAGAGCAGTCGTGT       |
|                             | ZmNAC89-2F        | TCACCGGCCGAATTCGTCGTT     |
|                             | ZmNAC89-2R        | CAAGCTCCAGCTACCTTCGCA     |

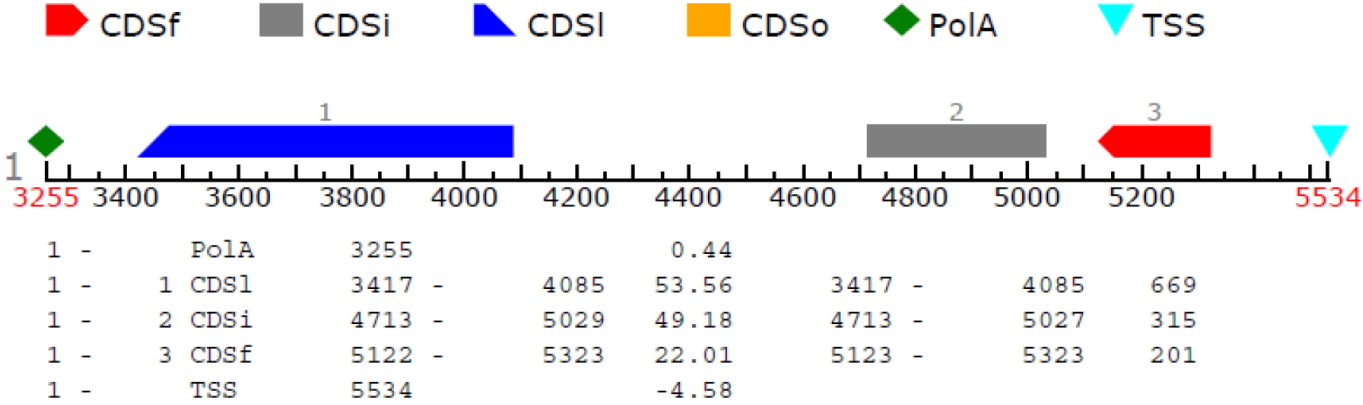

Figure S1. The gene prediction result by FGENESH. Transcription start site (TSS), first CDS (CDSf), internal CDS (CDSi), last CDS (CDSl), terminal polyA signal (PoIA).

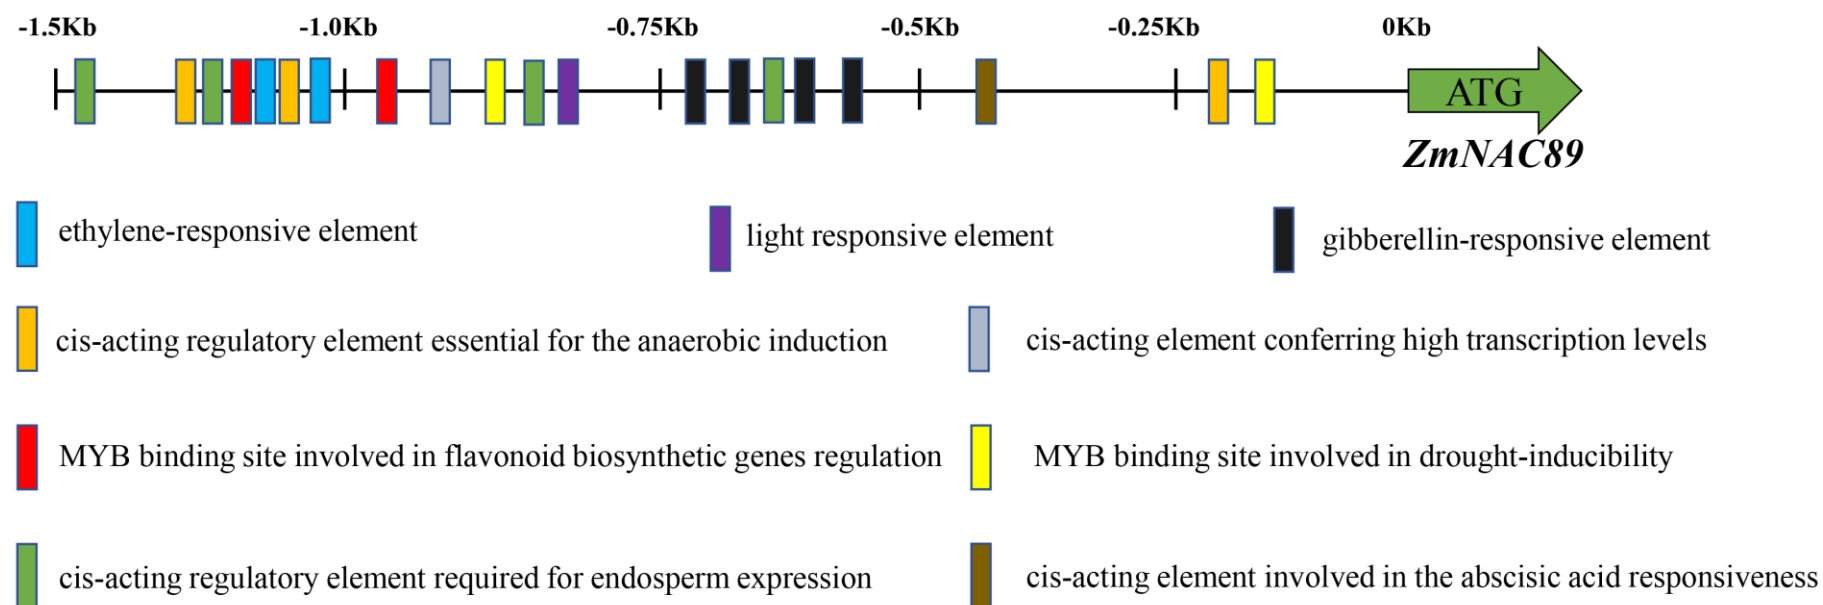

Figure S2. Analysis of flanking sequence of *ZmNAC89* gene.

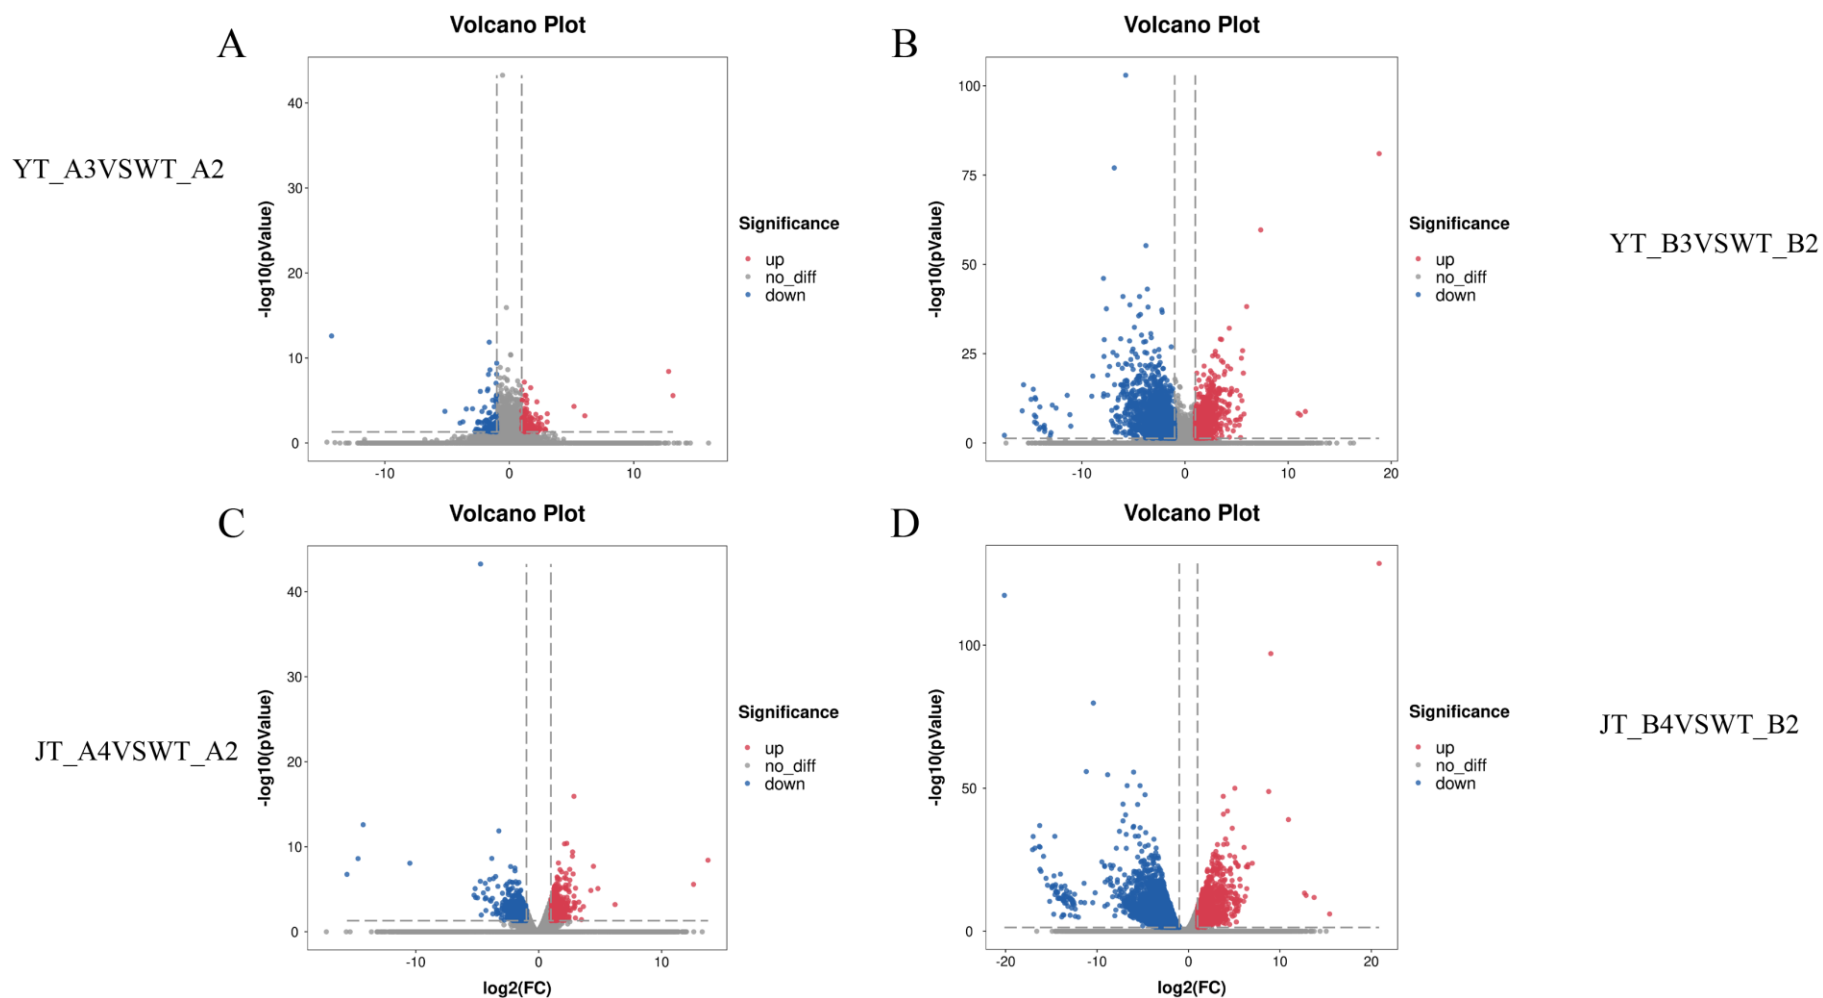

Figure S3. Different comparison group differentially expressed gene volcano map. (A) DEGs volcano map of WT plants under NaCl conditions. (B) DEGs volcano map of the transgenic *ZmNAC89* maize lines under NaCl conditions. (C) DEGs volcano map of WT plants under  $\text{Na}_2\text{CO}_3$  conditions. (D) DEGs volcano map of the transgenic *ZmNAC89* maize lines under  $\text{Na}_2\text{CO}_3$  conditions.

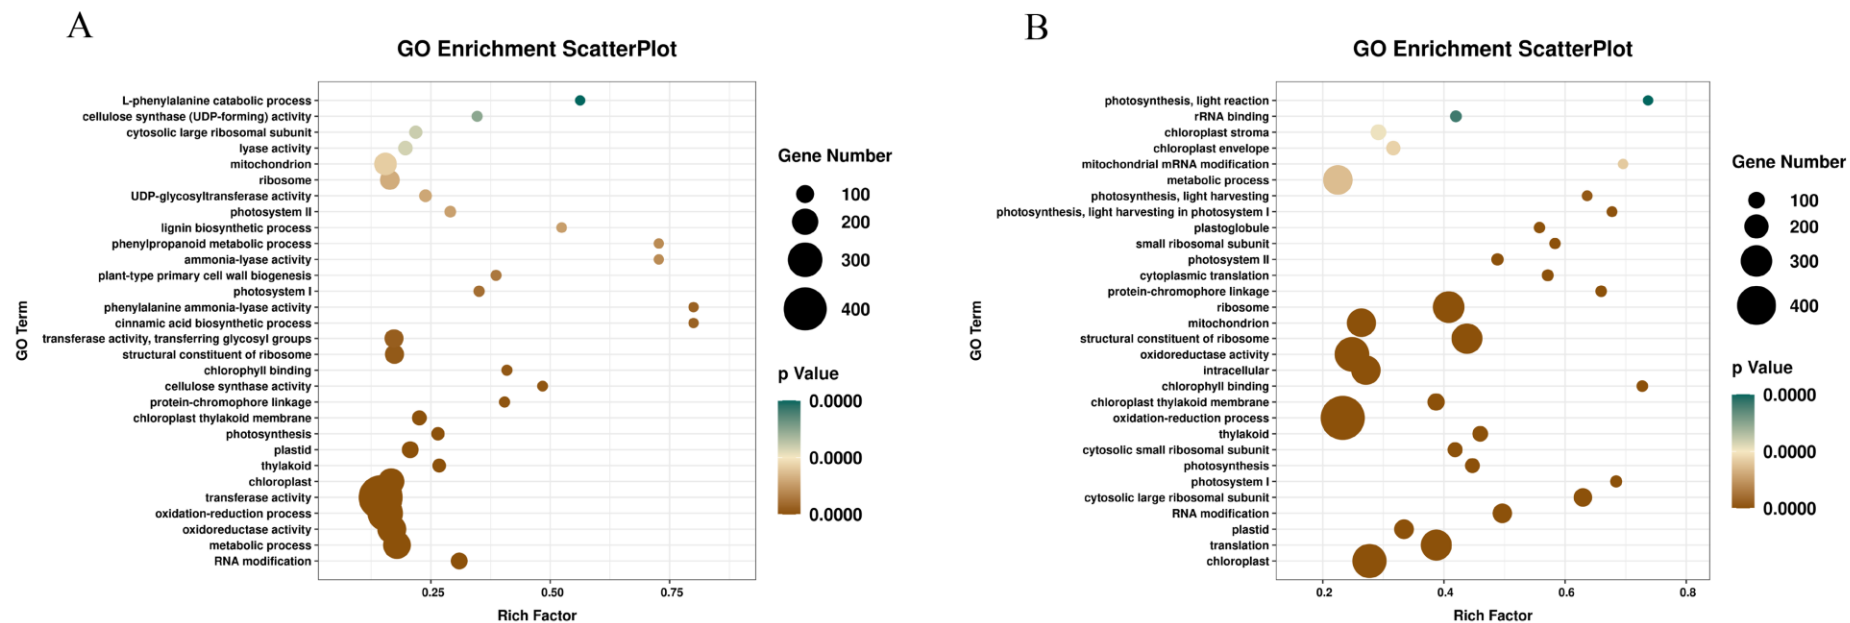

Figure S4. Scatter plot of GO enrichment under NaCl and Na<sub>2</sub>CO<sub>3</sub> conditions. (A) GO enrichment analysis under NaCl condition. (B) GO enrichment analysis under Na<sub>2</sub>CO<sub>3</sub> condition.
